# Supplementary material for: Dietary Lactoferrin Supplementation Improves Growth Performance and Intestinal Health of Juvenile Orange-Spotted Groupers (Epinephelus coioides)
Source: MDPI journal article supplement (doi:10.3390/metabo12100915), 2022-09-28
Supplement: s1 [file s1]

## Supplementary material

**Table S1:** MetaStat analysis of the abundance of DI bacterial phyla and genera ( $\times 10^{-4}$ ) of juvenile orange-spotted grouper in a 56-d feeding period.

|                                      | Diets          |                |                 |                 |                |
|--------------------------------------|----------------|----------------|-----------------|-----------------|----------------|
|                                      | FM             | SBM60          | LF2             | LF6             | LF10           |
| Phylum                               |                |                |                 |                 |                |
| Firmicutes                           | 3757.68±418.75 | 4505.65±781.74 | 2259.32±1420.22 | 4043.05±775.32  | 4424.59±491.46 |
| Proteobacteria                       | 2738.07±766.75 | 2313.86±920.10 | 5638.20±2435.90 | 2781.97±1410.64 | 2373.36±532.88 |
| Bacteroidetes                        | 2775.85±530.90 | 2493.30±505.40 | 1603.40±1069.54 | 2893.40±664.29  | 2901.57±83.84  |
| Fusobacteria                         | 34.49±17.62    | 487.82±352.13  | 356.26±345.18   | 43.62±42.49     | 35.04±9.47     |
| Spirochaetae                         | 456.43±438.31  | 18.82±3.93     | 2.75±1.84       | 79.96±53.54     | 44.72±11.97    |
| Genus                                |                |                |                 |                 |                |
| <i>Photobacterium</i>                | 1896.05±632.95 | 1117.64±704.11 | 3525.27±2715.36 | 1758.45±1508.44 | 1159.47±435.72 |
| <i>Selenomonas_1</i>                 | 1372.16±64.07  | 1304.08±301.40 | 532.34±320.71   | 1175.27±293.29  | 1478.02±272.20 |
| <i>Prevotella_1</i>                  | 831.10±152.96  | 778.75±207.82  | 511.73±305.10   | 879.39±303.93   | 920.75±171.80  |
| <i>Vibrio</i>                        | 68.29±66.84    | 371.93±369.97  | 1669.90±1644.07 | 76.05±60.73     | 171.74±109.18  |
| <i>Rikenellaceae_RC9_gut_group</i>   | 324.46±79.78   | 380.86±114.12  | 287.02±210.38   | 667.19±220.78   | 459.59±111.90  |
| <i>Curvibacter</i>                   | 296.70±59.07   | 279.94±142.20  | 70.35±23.07     | 324.18±133.27   | 396.59±125.58  |
| <i>Christensenellaceae_R-7_group</i> | 311.61±26.64   | 242.71±78.45   | 57.84±15.02     | 288.05±54.04    | 244.70±42.70   |
| <i>Veillonellaceae_UCG-001</i>       | 157.80±6.14    | 242.36±74.74   | 105.18±49.46    | 273.48±66.19    | 330.02±94.82   |
| <i>Anaerovibrio</i>                  | 151.00±40.18   | 220.31±12.55   | 139.94±83.43    | 199.57±21.26    | 340.19±48.37   |
| <i>Succiniclasicum</i>               | 159.93±34.58   | 211.24±67.49   | 145.78±99.86    | 203.41±75.71    | 237.14±60.63   |
| <i>unidentified</i>                  | 1510.38±212.00 | 1285.05±214.39 | 676.39±420.67   | 1327.85±324.27  | 1406.30±71.31  |

Values are means of 3 triplicates per dietary treatment.

FM, fish meal diet (control diet); SBM60, high soybean meal diet with 600 g/kg fish meal protein replacement and without LF supplementation; LF2, LF6, and LF10 were added 2, 6, and 10 g/kg LF in SBM60 diets, respectively.
